# Supplementary material for: Shifts of Antibiotic Resistomes in Soil Following Amendments of Antibiotics-Contained Dairy Manure
Source: MDPI journal article supplement (doi:10.3390/ijerph191710804), 2022-08-30
Supplement: s1 [file s1]

Supplementary data

# Shifts of Antibiotic Resistomes in Soil Following Amendments of Antibiotics-Contained Dairy Manure

Jijun Kang <sup>1,†</sup>, Yiming Liu <sup>1,†</sup>, Xiaojie Chen <sup>1</sup>, Fei Xu <sup>1</sup>, Wenguang Xiong <sup>2,\*</sup> and Xiubo Li <sup>1,\*</sup>

<sup>1</sup> Key Laboratory of Animal Antimicrobial Resistance Surveillance, Ministry of Agriculture and Rural Affairs, Feed Research Institute, Chinese Academy of Agricultural Sciences, Beijing 100081, China

<sup>2</sup> Guangdong Provincial Key Laboratory of Veterinary Pharmaceutic Development and Safety Evaluation, South China Agricultural University, Guangzhou 510642, China

\* Correspondence: xiongw@scau.edu.cn (W.X.); lixiubo@caas.cn (X.L.)

† These authors have contributed equally to this work.

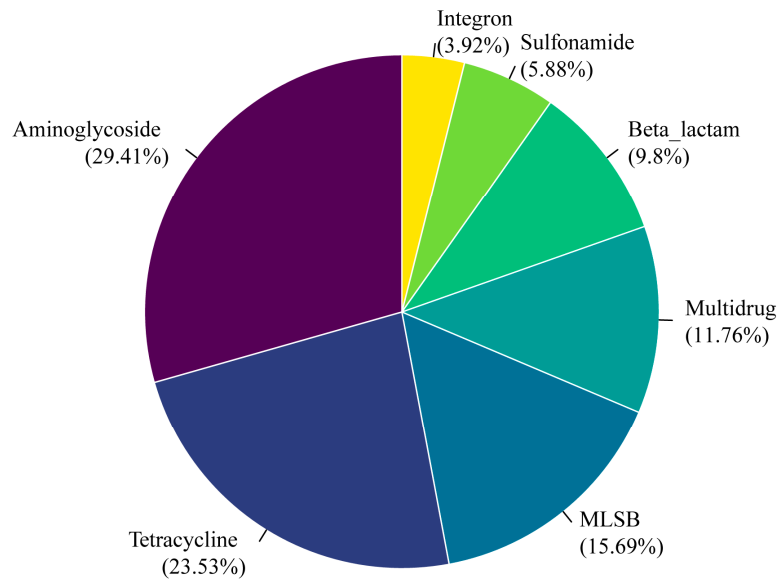

**Figure S1.** The percentage of detected different ARG types. MLSB: macrolide-lincosamide-Streptogramin B.

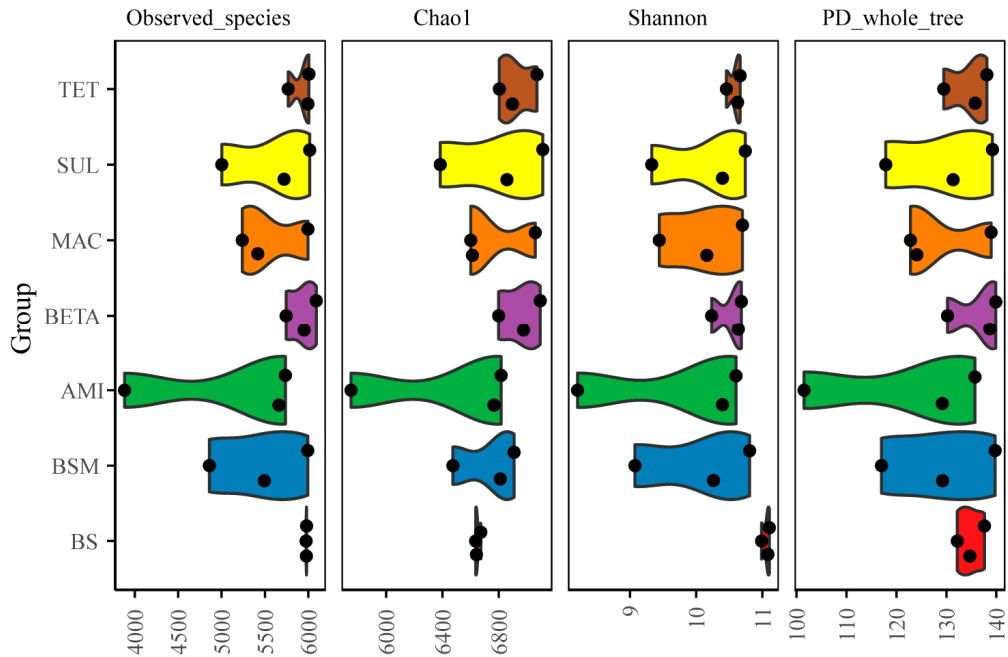

**Figure S2.** The alpha diversities of bacteria under seven treatments. The three nodes from left to right in each violin represent the Shannon index of day 1, 30, and 60. BS: blank control soil; BSM: soil+ dairy manure; AMI, BETA, MAC, SUL, and TET represent the soil with amended dairy manure by addition of aminoglycosides, beta-lactams, macrolides, sulfonamides and tetracyclines respectively.

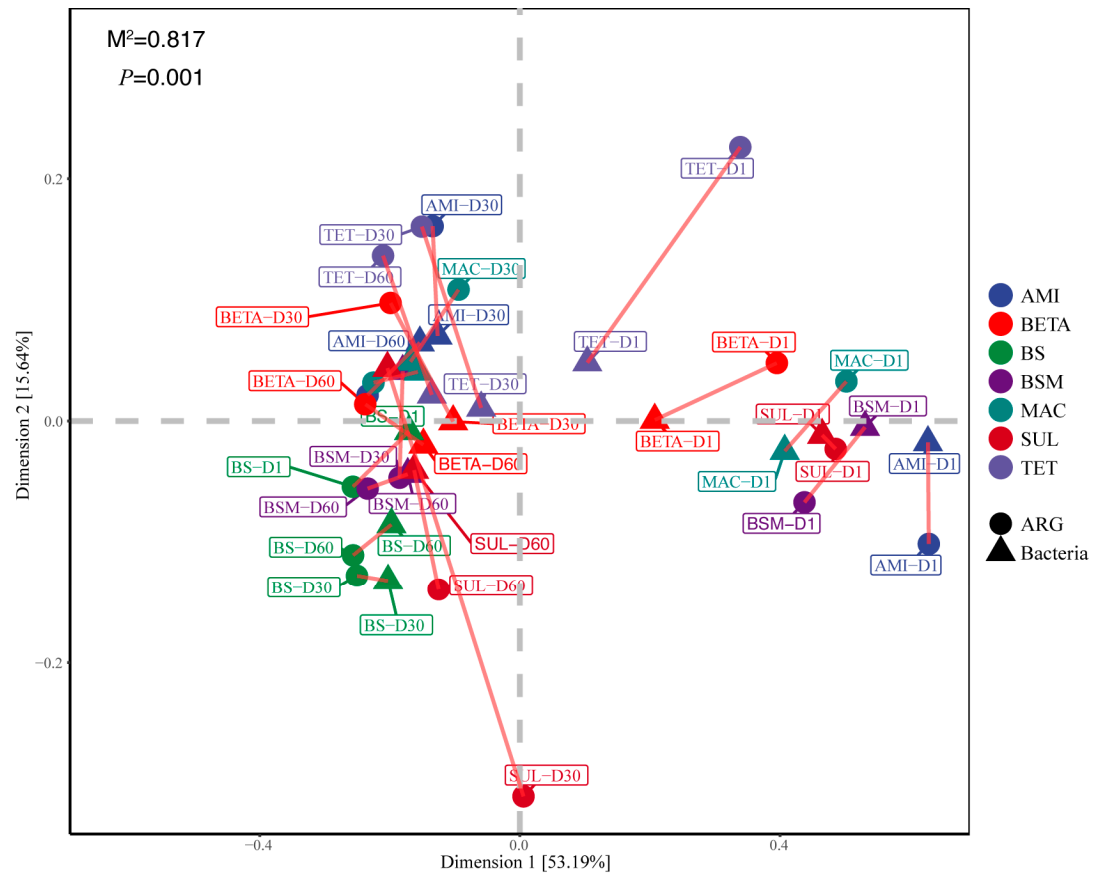

**Figure S3.** Procrustes analysis between ARG profiles and bacterial community.

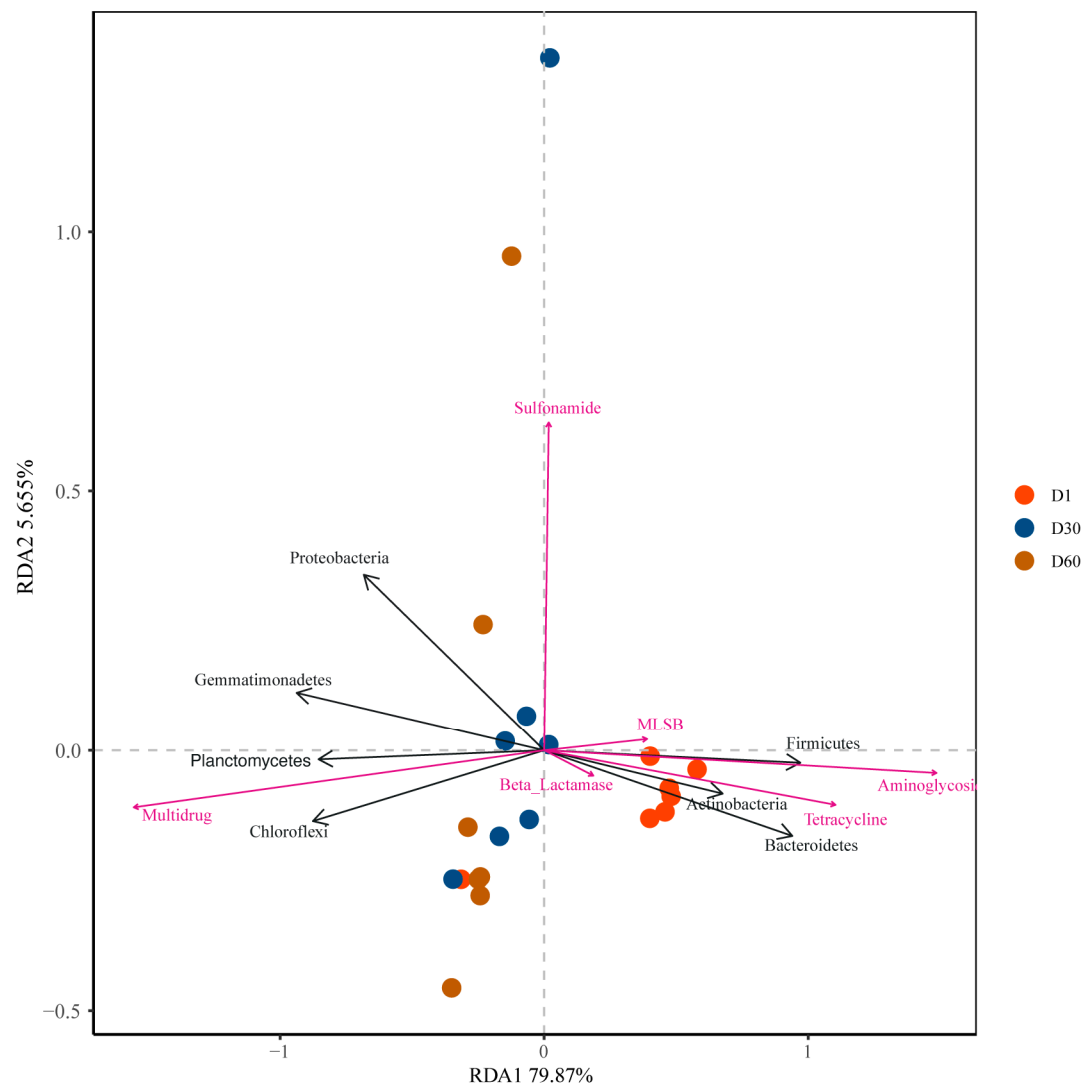

**Figure S4.** RDA analysis between ARG types and dominant bacteria.

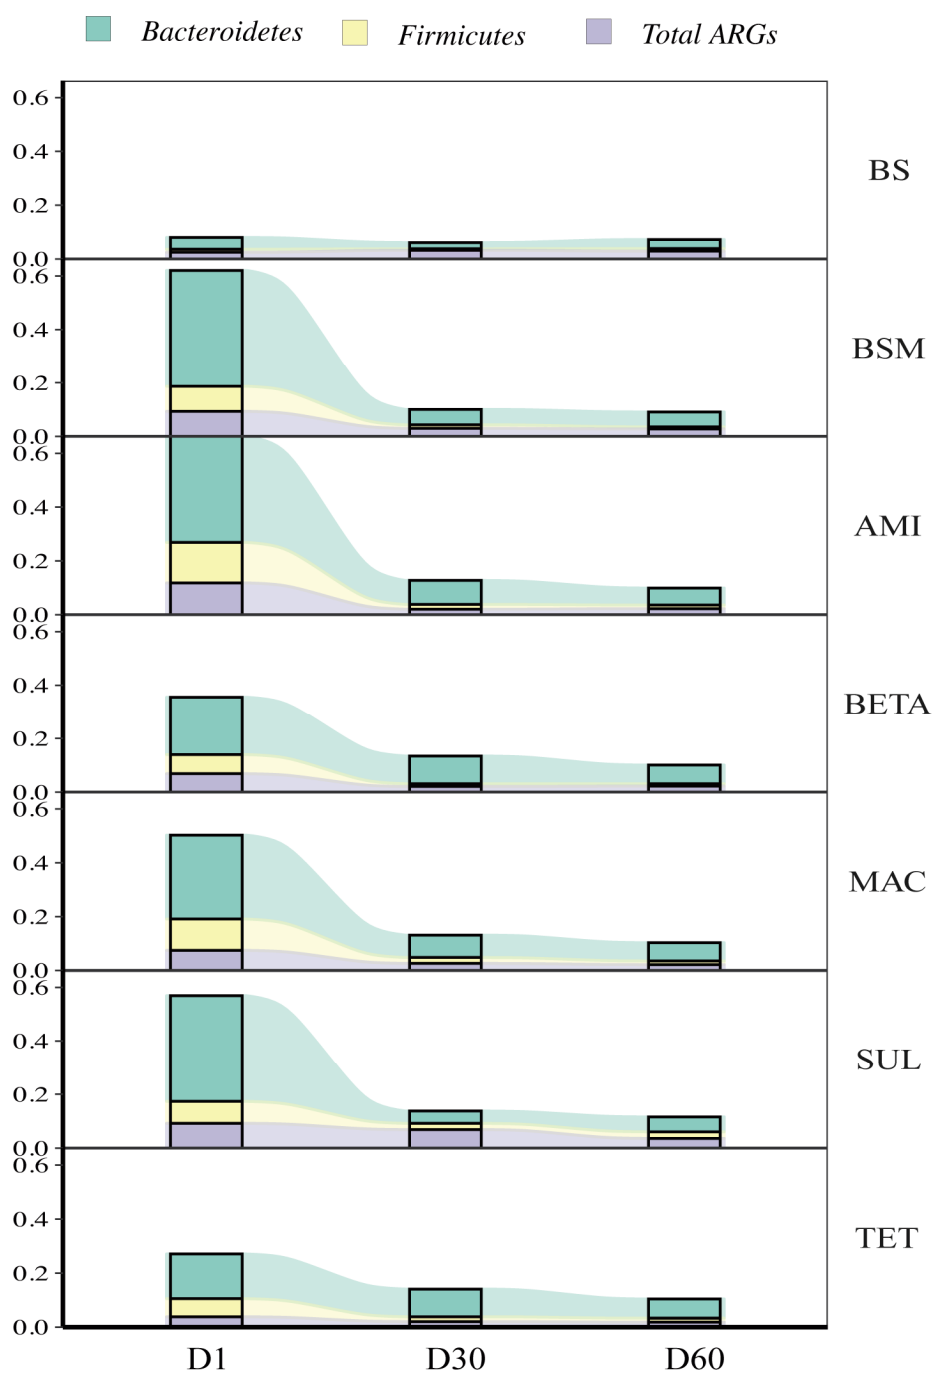

**Figure S5.** Dynamic shifts of relative abundance of *Firmicutes*, *Bacteroidetes*, and total ARGs.

**Table S1.** The information of antibiotic resistance genes (ARGs) for HT-qPCR.

| No. | Assay Name                               | Forward Primer (5' to 3')  | Reverse Primer (5' to 3')      | Classification | Mechanism  |
|-----|------------------------------------------|----------------------------|--------------------------------|----------------|------------|
| 1   | 16S rRNA gene                            | GGGTTGCGCTCGTTGC           | ATGGYTGTCTCGTCAGCTCGTG         |                |            |
| 2   | <i>aac(6')</i> -Ib(aka <i>aacA4</i> )-01 | GTTTGAGAGGCAAGGTACCGTAA    | GAATGCCTGGCGTGTTGA             | Aminoglycoside | Deactivate |
| 3   | <i>aac(6')</i> -Ib(aka <i>aacA4</i> )-02 | CGTCGCCGAGCAACTTG          | CGGTACCTTGCCCTCTCAAACC         | Aminoglycoside | Deactivate |
| 4   | <i>aac(6')</i> -Ib(aka <i>aacA4</i> )-03 | AGAAGCACGCCCCGACACTT       | GCTCTCCATTTCAGCATTGCA          | Aminoglycoside | Deactivate |
| 5   | <i>aacA/aphD</i>                         | AGAGCCTTGGAAGATGAAGTTT     | TTGATCCATACCATAGACTATCTCATCA   | Aminoglycoside | Deactivate |
| 6   | <i>aadA</i> -01                          | GTTGTGCACGACGACATCATT      | GGCTCGAAGATACCTGCAAGAA         | Aminoglycoside | Deactivate |
| 7   | <i>aadA</i> -02                          | CGAGATTCTCCGCGCTGTA        | GCTGCCATTCTCCAAATTGC           | Aminoglycoside | Deactivate |
| 8   | <i>aadA</i> 1                            | AGCTAAGCGCGAACTGCAAT       | TGGCTCGAAGATACCTGCAA           | Aminoglycoside | Deactivate |
| 9   | <i>aadA</i> 2-03                         | CAATGACATTCTTGCGGGTATC     | GACCTACCAAGGCAACGCTATG         | Aminoglycoside | Deactivate |
| 10  | <i>aadA</i> 5-01                         | ATCACGATCTTGCGATTTTGCT     | CTGCGGATGGGCCTAGAAG            | Aminoglycoside | Deactivate |
| 11  | <i>aadA</i> 5-02                         | GTTCTTGCTCTTGCTCGCATT      | GATGCTCGGCAGGCAAAC             | Aminoglycoside | Deactivate |
| 12  | <i>aadE</i>                              | TACCTTATTGCCCTTGGAAGAGTTA  | GGAACTATGTCCCTTTTAATTCTACAATCT | Aminoglycoside | Deactivate |
| 13  | <i>aphA</i> 1(aka <i>kanR</i> )          | TGAACAAGTCTGAAAAGAAATGCA   | CCTATTAATTTCCCCTCGTCAAAAA      | Aminoglycoside | Deactivate |
| 14  | <i>str</i>                               | AATGAGTTTTGGAGTGTCTCAACGTA | AATCAAAACCCCTATTAAAGCCAAT      | Aminoglycoside | Deactivate |
| 15  | <i>strA</i>                              | CCGGTGGCATTGAGAAAAA        | GTGGCTCAACCTGCGAAAAG           | Aminoglycoside | Deactivate |
| 16  | <i>strB</i>                              | GCTCGGTCTGTGAGAACAATCT     | CAATTCGGTTCGCCTGGTAGT          | Aminoglycoside | Deactivate |
| 17  | <i>bla</i> CMY                           | CCGCGGCGAAATTAAGC          | GCCACTGTTTGCTGTTCAGTT          | Beta_Lactamase | Deactivate |
| 18  | <i>bla</i> CMY2-01                       | AAAGCCTCAT GGGTGCATAAA     | ATAGCTTTTGTTTGCCAGCATCA        | Beta_Lactamase | Deactivate |
| 19  | <i>bla</i> CMY2-02                       | GCGAGCAGCCTGAAGCA          | CGGATGGGCTTGTCCTCTT            | Beta_Lactamase | Deactivate |
| 20  | <i>bla</i> CTX-M-01                      | GGAGGCGTGACGGCTTTT         | TTCAGTGCGATCCAGACGAA           | Beta_Lactamase | Deactivate |

|    |                     |                                  |                               |                |            |
|----|---------------------|----------------------------------|-------------------------------|----------------|------------|
| 21 | <i>bla</i> CTX-M-02 | GCCGCGGTGCTGAAGA                 | ATCGGATTATAGTTAACCAGGTCAGATTT | Beta_Lactamase | Deactivate |
| 22 | <i>bla</i> CTX-M-03 | CGATACCACCACGCCGTTA              | GCATTGCCCAACGTCAGATT          | Beta_Lactamase | Deactivate |
| 23 | <i>bla</i> CTX-M-04 | CTTGCGGTTGCGCTGAT                | CGTTCATCGGCACGGTAGA           | Beta_Lactamase | Deactivate |
| 24 | <i>bla</i> CTX-M-05 | GCGATAACGTGGCGATGAAT             | GTCGAGACGGAACGTTTCGT          | Beta_Lactamase | Deactivate |
| 25 | <i>bla</i> CTX-M-06 | CACAGTTGGTGACGTGGCTTAA           | CTCCGCTGCCGGTTTTATC           | Beta_Lactamase | Deactivate |
| 26 | <i>bla</i> SHV-01   | TCCCATGATGAGCACCTTTAAA           | TTCGTCACCGGCATCCA             | Beta_Lactamase | Deactivate |
| 27 | <i>bla</i> SHV-02   | CTTTCCCATGATGAGCACCTTT           | TCCTGCTGGCGATAGTGGAT          | Beta_Lactamase | Deactivate |
| 28 | <i>bla</i> TEM      | AGCATCTTACGGATGGCATGA            | TCCTCCGATCGTTGTCAGAAGT        | Beta_Lactamase | Deactivate |
| 29 | <i>bla</i> Z        | GGAGATAAAGTAACAAATCCAGTTAGATATGA | TGCTTAATTTTCCATTGCGATAAG      | Beta_Lactamase | Deactivate |
| 30 | <i>cfxA</i>         | TCATTCCCTCGTTCAAGTTTTCAGA        | TGCAGCACCAAGAGGAGATGT         | Beta_Lactamase | Deactivate |
| 31 | <i>mecA</i>         | GGTTACGGACAAGGTGAAATACTGAT       | TGTCTTTTAATAAGTGAGGTGCGTTAATA | Beta_Lactamase | Protection |
| 32 | <i>carB</i>         | GGAGTGAGGCTGACCGTAGAAG           | ATCGGCGAAACGCACAAA            | MLSB           | Efflux     |
| 33 | <i>ereA</i>         | CCTGTGGTACGGAGAATTCATGT          | ACCGCATTCGCTTTGCTT            | MLSB           | Deactivate |
| 34 | <i>erm</i> (35)     | TTGAAAACGATGTTGCATTAAGTCA        | TCTATAATCACAATAACCACTTGAACGT  | MLSB           | Protection |
| 35 | <i>ermB</i>         | TAAAGGGCATTTAACGACGAAACT         | TTTATACCTCTGTTTGTAGGGAATTGAA  | MLSB           | Protection |
| 36 | <i>ermC</i>         | TTTGAAATCGGCTCAGGAAAA            | ATGGTCTATTTCAATGGCAGTTACG     | MLSB           | Protection |
| 37 | <i>ermF</i>         | CAGCTTTGGTTGAACATTTACGAA         | AAATTCCTAAAATCACAACCGACAA     | MLSB           | Protection |
| 38 | <i>ermT</i> -01     | GTTCACTAGCACTATTTTAAATGACAGAAAGT | GAAGGGTGTCTTTTAAATACAATTAACGA | MLSB           | Protection |
| 39 | <i>ermT</i> -02     | GTAAATCCCTAGAGAATACTTTCATCCA     | TGAGTGATATTTTGAAGGGTGTCTT     | MLSB           | Protection |
| 40 | <i>ermY</i>         | TTGTCTTTGAAAGTGAAGCAACAGT        | TAACGCTAGAGAACGATTTGTATTGAG   | MLSB           | Protection |
| 41 | <i>lnuB</i> -01     | TGAACATAATCCCTCGTTTAAAGAT        | TAATTGCCCTGTTTCATCGTAAATAA    | MLSB           | Deactivate |
| 42 | <i>lnuB</i> -02     | AAAGGAGAAGGTGACCAATACTCTGA       | GGAGCTACGTCAAACAACCAGTT       | MLSB           | Deactivate |

|    |                     |                               |                          |              |            |
|----|---------------------|-------------------------------|--------------------------|--------------|------------|
| 43 | <i>lnuC</i>         | TGGTCAATATAACAGATGTAAACCAGATT | CACCCCAGCCACCATCAA       | MLSB         | Deactivate |
| 44 | <i>mdtA</i>         | CCTAACGGGCGTGACTTCA           | TTCACCTGTTTCAAGGGTCAAA   | MLSB         | Efflux     |
| 45 | <i>mefA</i>         | CCGTAGCATTGGAACAGCTTTT        | AAACGGAGTATAAGAGTGCTGCAA | MLSB         | Efflux     |
| 46 | <i>mphB</i>         | CGCAGCGCTTGATCTTGTAG          | TTACTGCATCCATACGCTGCTT   | MLSB         | Deactivate |
| 47 | <i>acrB-01</i>      | AGTCGGTGTTCCGCGTTAAC          | CAAGGAAACGAACGCAATACC    | Multidrug    | Efflux     |
| 48 | <i>acrF</i>         | GCGGCCAGGCACAAAA              | TACGCTCTTCCCACGGTTTC     | Multidrug    | Efflux     |
| 49 | <i>emrD</i>         | CTCAGCAGTATGGTGGTAAGCATT      | ACCAGGCGCCGAAGAAC        | Multidrug    |            |
| 50 | <i>floR</i>         | ATTGTCTTCACGGTGTCGTTA         | CCGCGATGTCGTCGAACT       | Multidrug    | Efflux     |
| 51 | <i>mepA</i>         | ATCGGTCGCTCTTCGTTAC           | ATAAATAGGATCGAGCTGCTGGAT | Multidrug    | Efflux     |
| 52 | <i>mexF</i>         | CCGCGAGAAGGCCAAGA             | TTGAGTTCGGCGGTGATGA      | Multidrug    | Efflux     |
| 53 | <i>yceE/mdtG-01</i> | TGGCACAAAATATCTGGCAGTT        | TTGTGTGGCGATAAGAGCATTAG  | Multidrug    | Efflux     |
| 54 | <i>yceE/mdtG-02</i> | TTATCTGTTTTCTGCTCACCTTCTTTT   | GCGTGGTGACAAACAGGCTTA    | Multidrug    | Efflux     |
| 55 | <i>yceL/mdtH-01</i> | TCGGGATGGTGGGCAAT             | CGATAACCGAGCCGATGTAGA    | Multidrug    | Efflux     |
| 56 | <i>yceL/mdtH-02</i> | CGCGTGAAACCTTAAGTGCTT         | AGACGGCTAAACCCCATATAGCT  | Multidrug    | Efflux     |
| 57 | <i>yceL/mdtH-03</i> | CTGCCGTAAATGGATGTATGC         | ACTCCAGCGGGCGATAGG       | Multidrug    | Efflux     |
| 58 | <i>yidY/mdtL-01</i> | GCAGTTGCATATCGCCTTCTC         | CTTCCCGCAAACAGCAT        | Multidrug    | Efflux     |
| 59 | <i>yidY/mdtL-02</i> | TGCTGATCGGGATTCTGATTG         | CAGGCGCGACGAACATAAT      | Multidrug    | Efflux     |
| 60 | <i>dfrA1</i>        | GGAATGGCCCTGATATTCCA          | AGTCTTGCGTCCAACCAACAG    | Sulfonamide  | Deactivate |
| 61 | <i>dfrA12</i>       | CCTCTACCGAACCGTCACACA         | GCGACAGCGTTGAAACAACACTAC | Sulfonamide  | Deactivate |
| 62 | <i>sul1</i>         | CAGCGCTATGCGCTCAAG            | ATCCCGCTGCGCTGAGT        | Sulfonamide  | Protection |
| 63 | <i>sul2</i>         | TCATCTGCCAAACTCGTCGTTA        | GTCAAAGAACGCCGCAATGT     | Sulfonamide  | Protection |
| 64 | <i>tet32</i>        | CCATTACTTCGGACAACGGTAGA       | CAATCTCTGTGAGGGCATTTAACA | Tetracycline | Protection |



|    |                       |                                    |                              |              |               |
|----|-----------------------|------------------------------------|------------------------------|--------------|---------------|
| 65 | <i>tet36-01</i>       | AGAATACTCAGCAGAGGTCAGTTCCT         | TGGTAGGTCGATAACCCGAAAAT      | Tetracycline | Protection    |
| 66 | <i>tet36-02</i>       | TGCAGGAAAGACCTCCATTACAG            | CTTTGTCCACACTTCCACGTACTATG   | Tetracycline | Protection    |
| 67 | <i>tetA-01</i>        | GCTGTTTGTCTGCCGAAA                 | GGTTAAGTTCCTTGAACGCAAAT      | Tetracycline | Efflux        |
| 68 | <i>tetA-02</i>        | CTCACCAGCCTGACCTCGAT               | CACGTTGTTATAGAAGCCGCATAG     | Tetracycline | Efflux        |
| 69 | <i>tetC-01</i>        | CATATCGCAATACATGCGAAAAA            | AAAGCCGCGGTAAATAGCAA         | Tetracycline | Efflux        |
| 70 | <i>tetC-02</i>        | ACTGGTAAGGTAAACGCCATTGTC           | ATGCATAAACCCAGCCATTGAGTAAG   | Tetracycline | Efflux        |
| 71 | <i>tetH</i>           | TTTGGGTCATCTTACCAGCATTAA           | TTGCGCATTATCATCGACAGA        | Tetracycline | Efflux        |
| 72 | <i>tetM-01</i>        | CATCATAGACACGCCAGGACATAT           | CGCCATCTTTTGCAGAAATCA        | Tetracycline | Protection    |
| 73 | <i>tetM-02</i>        | TAATATTGGAGTTTGTAGCTCATGTTGATG     | CCTCTCTGACGTTCTAAAAGCGTATTAT | Tetracycline | Protection    |
| 74 | <i>tetO-01</i>        | ATGTGGATACTACAACGCATGAGATT         | TGCCTCCACATGATATTTTTCCT      | Tetracycline | Protection    |
| 75 | <i>tetPA</i>          | AGTTGCAGATGTGTATAGTCGTAAACTATCTATT | TGCTACAAGTACGAAAACAAAAGTAGAA | Tetracycline | Efflux        |
| 76 | <i>tetQ</i>           | CGCCTCAGAAGTAAGTTCATACACTAAG       | TCGTTTCATGCGGATATTATCAGAAT   | Tetracycline | Protection    |
| 77 | <i>tetT</i>           | CCATATAGAGGTTCCACCAAATCC           | TGACCCTATTGGTAGTGGTTCTATTG   | Tetracycline | Protection    |
| 78 | <i>tetX</i>           | AAATTTGTTACCGACACGGAAGTT           | CATAGCTGAAAAAATCCAGGACAGTT   | Tetracycline | Other/unknown |
| 79 | <i>clnI-1(class1)</i> | GGCATCCAAGCAGCAAG                  | AAGCAGACTTGACCTGA            | Integron     | integrase     |
| 80 | <i>intI-1(clinic)</i> | CGAACGAGTGGCGGAGGGTG               | TACCCGAGAGCTTGGCACCCA        | Integron     | Integrase     |

**Table S2.** Shared and exclusive genes among seven treatment.

| Modules                                           | ARG subtypes                                                                                                                                                                                                                                                                                                                                                                                | ARG types                                                                         |
|---------------------------------------------------|---------------------------------------------------------------------------------------------------------------------------------------------------------------------------------------------------------------------------------------------------------------------------------------------------------------------------------------------------------------------------------------------|-----------------------------------------------------------------------------------|
| 9 genes shared among all experimental groups      | <i>aadA</i> -02, <i>aadA</i> 2-03, <i>aadA</i> -01, <i>strB</i> , <i>intl</i> -1(clinic), <i>clntl</i> -1(class1), <i>mexF</i> , <i>sul2</i> , <i>tetO</i> -01                                                                                                                                                                                                                              | Aminoglycoside, multidrug, sulfonamide, tetracycline, Integron                    |
| 21 genes shared among all manure-contained groups | <i>aadA</i> 5-01, <i>aadE</i> , <i>aacA</i> , <i>aphD</i> , <i>aac</i> (6')-Ib(aka <i>aacA</i> 4)-01, <i>aphA</i> 1(aka <i>kanR</i> ), <i>cfxA</i> , <i>ermF</i> , <i>erm35</i> , <i>mefA</i> , <i>lnuB</i> -01, <i>lnuB</i> -02, <i>dfrA</i> 1, <i>tetX</i> , <i>tet36</i> -02, <i>tetM</i> -01, <i>tetPA</i> , <i>tetT</i> , <i>tetM</i> -02, <i>tetQ</i> , <i>tet36</i> -01, <i>tetH</i> | Aminoglycoside, beta_lactam, multidrug, MLSB, sulfonamide, tetracycline, Integron |
| 7 genes exclusive for antibiotic-contained groups | <i>aac</i> (6')-Ib, (aka <i>aacA</i> 4)-03, <i>tet32</i> , <i>yidY/mdtL</i> -01, <i>aadA</i> 1, <i>emrD</i> , <i>aac</i> (6')-Ib(aka <i>aacA</i> 4)-02, <i>ermB</i>                                                                                                                                                                                                                         | Aminoglycoside, tetracycline, multidrug, MLSB                                     |
